# Supplementary material
Source: PubMed Central journal article supplement (PMC4279731)
Supplement: ASN.2013101045_ASN2013101045SupplementaryData.pdf [file ASN.2013101045_ASN2013101045SupplementaryData.pdf]

## Supplemental Methods

### Generation of the BAC construct with a mutated *RBP-J*-binding site

*Bacterial strain, BAC clone and plasmid.* We used SW102 cells, which contain a defective  $\lambda$  prophage with *ci857* repressor, obtained from the National Cancer Institute. The BAC clone RP2388K7 containing the renin gene was purchased from CHORI (Oakland, CA). In this clone the renin gene is centrally located, being flanked by 89kb of DNA 5' and 129kb 3'. The *RpsL*<sup>+</sup>-*Kana* plasmid was obtained from Addgene (Cambridge, MA). This plasmid has the *RpsL*<sup>+</sup>-*Kana* selectable markers. *RpsL* expression results in streptomycin sensitivity (*RpsL*<sup>+</sup>), whereas the aminoglycoside phosphotransferase gene (*Aph*) expression results in kanamycin resistance (*kana*).

*Two step recombineering strategy.* We used dual kanamycin and streptomycin selection to make a precise modification in the BAC construct in a two-step procedure as described in Wang *et al.*, 2009.<sup>35</sup> First, the *RpsL*<sup>+</sup>-*Kana* cassette was introduced into the area of interest yielding kanamycin resistant cells. Second, the *RpsL*<sup>+</sup>-*Kana* cassette was replaced with the desired sequence yielding streptomycin resistant cells. In the control construct exon 1 of the renin gene was replaced with EGFP (Clontech Laboratories, Mountain View, CA) then the renin 3'-UTR was inserted at the 3' end of the EGFP sequence mimicking the endogenous renin gene. Primers used to PCR amplify the desired fragments contained 80 bp homologous to the target region of the BAC for recombination and 20 bp from the *RpsL*<sup>+</sup>-*Kana* cassette. In order to obtain the recombination segment, we performed a PCR using *RpsL*<sup>+</sup>-*Kana* plasmid DNA and the primer pairs designed to the area of interest (Supplemental Table 4) using a proofreading polymerase (catalog no. 600677, Herculase II Fusion DNA polymerase, Stratagene, Santa Clara, CA) to avoid PCR errors. The PCR reaction was digested with *DpnI* (R0176S, New England BioLabs, Inc., Ipswich, MA) to eliminate the plasmid and the PCR fragment was gel

purified using a Qiaquick Gel Extraction kit (catalog no. 28704, Qiagen, Valencia, CA). To confirm that colonies underwent the appropriate recombination to introduce the EGFP and renin 3'UTR sequences, single-colony PCRs were performed with primers flanking the region of interest and the PCR products were sequenced. To introduce the mutated *RBP-J* binding sequence the *RpsL<sup>+</sup>-Kana* cassette was replaced using a synthetic 100 bp oligonucleotide containing 46 nucleotides flanking the 8 nucleotides of the mutated *RBP-J* consensus sequence. The insertion of the mutation was verified by DNA sequencing.

The recombined BAC clones were transfected into recombination incompetent cells (NEB-10-beta *E.coli*, catalog no. C3020K, New England BioLabs, Inc., Ipswich, MA) to avoid accidental recombination. BAC DNA was extracted using the NucleoBond BAC 100 kit (Macherey-Nagel Inc., Bethlehem, PA) and used for confirmation of clone integrity by restriction enzyme digestion and PCR analysis. The integrity of the whole BAC was confirmed by digesting the starting clone and the recombinants with *SpeI* (catalog no. R0133S, New England BioLabs, Inc., Ipswich, MA) and comparing the band patterns in agarose gels. Further, we amplified by PCR and sequenced amplicons from various regions of the BAC. Specifically, 240bp of the renin proximal promoter and the EGFP-renin 3'UTR sequences were confirmed as well as the ends of the BAC construct. The regulatory region upstream of renin was verified by PCR of multiple overlapping amplicons covering 1300bp of the proximal promoter, including the *RBP-J* site, and 1200 bp including the renin enhancer and surrounding sequences. After BAC integrity verification, DNA was microinjected by the University of Virginia Gene Targeting and Transgenic Facility to produce transgenic mice. To confirm that the intended mutation of the *RBP-J* binding site was present in the study mice, DNA was extracted from tails of transgenic WT-BAC and Mut-BAC mice and the region around the *RBP-J* binding site in the transgene was amplified by PCR and the amplicon was sequenced (Supplemental Figure 5).

## **TUNEL assay**

To identify apoptotic cells we used the Apoptag Peroxidase In situ Apoptosis Detection kit (S7100, Millipore, Billerica, MA) in kidney sections fixed in Bouin's solution according to the manufacturer's instructions. The TUNEL assay involves addition of labeled nucleotides at DNA strand breaks by terminal deoxynucleotidyl transferase (TdT) and immunoperoxidase detection of these digoxigenin-labeled DNA strand breaks.

Supplemental Table 1

Renin expression in kidneys of *RBP-J cKO;R26R* mice

| Denomination               | Genotype                                                                | Age(mo) | n | JGA index | relative expression of renin mRNA |
|----------------------------|-------------------------------------------------------------------------|---------|---|-----------|-----------------------------------|
| <i>RBP-J<sup>+/+</sup></i> | <i>RBP-J<sup>+/+</sup>; Ren1<sup>dcre/+</sup>; R26R<sup>-/+</sup></i>   | 1       | 3 | 43.8±2.7  | 100                               |
| <i>RBP-J cKO</i>           | <i>RBP-J<sup>fl/fl</sup>; Ren1<sup>dcre/+</sup>; R26R<sup>-/+</sup></i> | 1       | 5 | 6.1±0.9** | 15.0±0.9*                         |
| <i>RBP-J<sup>+/+</sup></i> | <i>RBP-J<sup>+/+</sup>; Ren1<sup>dcre/+</sup>; R26R<sup>-/+</sup></i>   | 2       | 4 | 34.5±9.5  | 100                               |
| <i>RBP-J cKO</i>           | <i>RBP-J<sup>fl/fl</sup>; Ren1<sup>dcre/+</sup>; R26R<sup>-/+</sup></i> | 2       | 6 | 4.7±0.7** | 26±0.18**                         |

\*\*p<0.0006 and \*p<0.02 when compared to control *RBP-J<sup>+/+</sup>* mice, values are mean ± SEM, n = number of mice, mo=months.

Supplemental Table 2. Deletion of *RBP-J* in renin cells does not increase cell death

| Denomination               | Genotype                                            | Newborn | n | Untreated adult | n | Treated adult | n |
|----------------------------|-----------------------------------------------------|---------|---|-----------------|---|---------------|---|
| <i>RBP-J<sup>+/+</sup></i> | <i>RBP-J<sup>+/+</sup>; Ren1<sup>dcre/+</sup></i>   | 5±2.2   | 3 | 9±0.9           | 2 | 31±6.1        | 5 |
| <i>RBP-J cKO</i>           | <i>RBP-J<sup>fl/fl</sup>; Ren1<sup>dcre/+</sup></i> | 6±1.6   | 5 | 3±0.3           | 2 | 33±5.9        | 4 |

Values are the percent of apoptotic cells: number of apoptotic cells/number of glomeruli X 100 expressed as mean ± SEM, Treated adult = mice treated with captopril and sodium depletion for 7 days to induce re-expression of renin, n = number of mice

**Supplemental Table 3.** Genes characteristic of hematopoietic marker cells significantly enriched in arterioles from *RBP-J* cKO mice

| Gene symbol  | Gene name                                                      | fold change | Expression                                                                                              | Function                                                                                                                                                                                               | Ref |
|--------------|----------------------------------------------------------------|-------------|---------------------------------------------------------------------------------------------------------|--------------------------------------------------------------------------------------------------------------------------------------------------------------------------------------------------------|-----|
| LOC546230    | similar to Ig heavy chain V region 102 precursor               | 8.74        | B-lymphocytes                                                                                           | B immune development                                                                                                                                                                                   | 1   |
| Havcr1       | hepatitis A virus cellular receptor 1                          | 7.53        | T helper cells                                                                                          | modulate immune response                                                                                                                                                                               | 2   |
| Lcn2         | lipocalin 2                                                    | 5.25        | early marker of granulocytic differentiation; expressed in several other tissue including kidney        | innate immunity                                                                                                                                                                                        | 3,4 |
| Abp1         | amiloride binding protein 1 (amine oxidase, copper-containing) | 4.98        | epithelium-rich and/or hematopoietic tissues                                                            | controlling the level of histamine and/or putrescine                                                                                                                                                   | 5   |
| Lyz2         | lysozyme 2                                                     | 4.37        | myeloblasts, immature macrophages, and in both mature macrophages                                       | bacteriolytic function                                                                                                                                                                                 | 6   |
| LOC641089    | similar to Ig heavy chain V region BCL1 precursor              | 4.05        | B lymphocytes                                                                                           | immune development and function                                                                                                                                                                        | 7   |
| Il6          | interleukin 6                                                  | 4           | T and B cells, monocytes, fibroblast, keratinocytes, endothelial cells, mesangium cells and tumor cells | differentiation of B-cells into Ig-secreting cells. Involved in lymphocyte and monocyte differentiation.                                                                                               | 8   |
| Atp4a        | ATPase, H+/K+ exchanging, gastric, alpha polypeptide           | 3.79        | gastric parietal cells                                                                                  | responsible for acid production in the stomach                                                                                                                                                         |     |
| Ccl9         | chemokine (C-C motif) ligand 9                                 | 3.74        | T and B cells                                                                                           | induction of innate and adaptive immune responses                                                                                                                                                      | 9   |
| Fcamr        | Fc receptor, IgA, IgM, high affinity                           | 3.01        | oligodendrocytes, B-cells and macrophages                                                               | roles in host immunity, allergy and autoimmunity                                                                                                                                                       | 10  |
| Timd2        | T-cell immunoglobulin and mucin domain containing 2            | 2.93        | T helper cells                                                                                          | regulating autoimmune inflammation                                                                                                                                                                     | 11  |
| LOC672291    | similar to Ig kappa chain V-V region MOPC 173                  | 2.91        | B lymphocytes                                                                                           | immune development and function                                                                                                                                                                        | 12  |
| Cyp2d9       | cytochrome P450, family 2, subfamily d, polypeptide 9          | 2.8         | Liver, kidney and extra hepatic tissue                                                                  | Male-specific; regulated by GH; sterol 16a-hydroxylase                                                                                                                                                 | 13  |
| Ccl2         | chemokine (C-C motif) ligand 2                                 | 2.76        | bone marrow osteoblasts, endothelial cells, stromal cells, and prostate cancer cells                    | recruits and activates monocytes during the inflammatory response                                                                                                                                      | 14  |
| Bcl2a1c      | B-cell leukemia/lymphoma 2 related protein A1c                 | 2.66        | B lymphocytes                                                                                           | may function in the response of hematopoietic cells to external signals and in maintaining endothelial survival during infection                                                                       | 15  |
| LOC100047162 | similar to immunoglobulin kappa-chain                          | 2.65        | B lymphocytes                                                                                           | immune development and function                                                                                                                                                                        | 16  |
| Ccl5         | chemokine (C-C motif) ligand 5                                 | 2.56        | T cells                                                                                                 | acts as a ligand for the chemokine receptors and directs the migration of monocytes/macrophages and T cells                                                                                            | 17  |
| Ms4a7        | membrane-spanning 4-domains, subfamily A, member 7             | 2.56        | hematopoietic cells and nonlymphoid tissues                                                             | mature cellular function in the monocytic lineage, and it may be a component of a receptor complex involved in signal transduction                                                                     | 18  |
| S100g        | S100 calcium binding protein G                                 | 2.56        | uterus and interimplantation sites during early pregnancy                                               | implicated in both intracellular and extracellular functions, including enzyme activities, immune responses, cytoskeleton dynamics, Ca <sup>2+</sup> homeostasis, cell growth and cell differentiation | 19  |
| Cd44         | CD44 antigen                                                   | 2.54        | expressed in epithelial, mesothelial and hematopoietic tissues                                          | involvement in cell aggregation, signaling, cell migration, retention of pericellular matrix, and others. Co-stimulatory molecules to induce T-cells                                                   |     |

|              |                                                                          |      |                                                                                                                                | functions                                                                                                                                                                               |    |
|--------------|--------------------------------------------------------------------------|------|--------------------------------------------------------------------------------------------------------------------------------|-----------------------------------------------------------------------------------------------------------------------------------------------------------------------------------------|----|
| Igk-C        | immunoglobulin kappa chain, constant region                              | 2.49 | B lymphocytes and epithelial carcinoma cell lines                                                                              | involved in inflammatory response and detected in various inflammatory diseases                                                                                                         |    |
| Cd209a       | CD209a antigen                                                           | 2.47 | dendritic cells and in lung, spleen, lymph nodes and bone marrow                                                               | pathogen-recognition receptor. May mediate the endocytosis of pathogens                                                                                                                 | 20 |
| Emr1         | EGF-like module containing, mucin-like, hormone receptor-like sequence 1 | 2.4  | myeloid lineage                                                                                                                | may be involved in cell-cell interactions                                                                                                                                               | 21 |
| Igk-V28      | immunoglobulin kappa chain variable 28 (V28)                             | 2.4  | B lymphocytes                                                                                                                  | immune response                                                                                                                                                                         | 22 |
| Mpeg1        | macrophage expressed gene 1                                              | 2.39 | macrophages                                                                                                                    | induction by CSF-1 in fetal liver macrophages                                                                                                                                           | 23 |
| Rgs1         | regulator of G-protein signaling 1                                       | 2.37 | murine B lymphocytes                                                                                                           | selectively regulates gut T cell trafficking and colitic potential                                                                                                                      | 24 |
| Slamf7       | SLAM family member 7                                                     | 2.36 | spleen, lymph node, bone marrow, NK cells, B-cells and testis. Lower levels detected in thymus.                                | mediates NK cell activation. May play a role in lymphocyte adhesion                                                                                                                     | 25 |
| Igkv1-117    | immunoglobulin kappa chain variable 1-117                                | 2.36 | B lymphocytes                                                                                                                  | immune development and function                                                                                                                                                         | 22 |
| Clec7a       | C-type lectin domain family 7, member a                                  | 2.34 | myeloid dendritic cells, monocytes, macrophages and B cells                                                                    | innate immune response Enhances cytokine production in macrophages and dendritic cells                                                                                                  | 26 |
| C3ar1        | complement component 3a receptor 1                                       | 2.25 | lymphoid organs                                                                                                                | central role in inflammatory processes                                                                                                                                                  | 27 |
| Ccl3         | chemokine (C-C motif) ligand 3                                           | 2.24 | macrophages and other inflammatory cells                                                                                       | promotes inflammation and has been proposed to be involved in a spectrum of diseases from asthma to multiple sclerosis                                                                  | 28 |
| C1qb         | complement component 1, q subcomponent, beta polypeptide                 | 2.23 | macrophages and dendritic cells                                                                                                | recognizes antibody-bound pathogens and recognizes apoptotic debris and thus augments phagocytosis                                                                                      | 29 |
| C8g          | complement component 8, gamma polypeptide                                | 2.2  | immune cells                                                                                                                   | anti-inflammatory and/or antimicrobial activity                                                                                                                                         |    |
| LOC100046894 | similar to Igk-C protein                                                 | 2.18 | B lymphocytes                                                                                                                  | immune development and function                                                                                                                                                         |    |
| Mgl2         | macrophage galactose N-acetyl-galactosamine specific lectin 2            | 2.17 | connective tissue macrophages; bone marrow-derived dendritic cells                                                             | immune responses in the skin                                                                                                                                                            | 30 |
| Tlr13        | toll-like receptor 13                                                    | 2.16 | APCs as well as mucosal epithelial cells                                                                                       | key component of innate and adaptive immunity. Response against pathogens through recognition of molecular patterns specific to microorganisms                                          | 31 |
| Gp49a        | glycoprotein 49 A                                                        | 2.15 | mononuclear phagocytes, NK cells, and mast cell                                                                                | may play a role in cell-cell or cell-cytokine interactions during the development of mast cells                                                                                         | 32 |
| Atp6v0d2     | ATPase, H+ transporting, lysosomal V0 subunit D2                         | 2.15 | osteoclasts                                                                                                                    | control of bone homeostasis under normal development                                                                                                                                    | 33 |
| Fbxo36       | F-box protein 36                                                         | 2.12 | brain, germ cells, kidney, mammary gland and tumor, pituitary gland, placenta, sertoli cells, testis, uterus and spermatocytes | regulate the cell cycle, immune response, signaling cascades and developmental programs by targeting proteins, such as cyclins, for degradation by the proteasome after ubiquitination. |    |
| C1qa         | complement component 1, q subcomponent, alpha polypeptide                | 2.12 | dendritic cells and macrophages                                                                                                | Proinflammatory functions and bind to Fc portion of aggregated immunoglobulins                                                                                                          | 34 |

|                 |                                                                              |      |                                                                                                            |                                                                                                         |    |
|-----------------|------------------------------------------------------------------------------|------|------------------------------------------------------------------------------------------------------------|---------------------------------------------------------------------------------------------------------|----|
| Prame           | preferentially expressed antigen in melanoma                                 | 2.12 | testis, many melanomas and cancer cells including leukemic cells and T cells                               | expressed in a variety of cancer cells including leukemic cells                                         | 35 |
| Slc1a4          | solute carrier family 1 (glutamate/neutral amino acid transporter), member 4 | 2.11 | cerebellar Purkinje cells on postsynaptic dendritic spines                                                 | is essential for the efficient removal of glutamate from extracellular fluids                           | 36 |
| Pilra           | paired immunoglobulin-like type 2 receptor alpha                             | 2.1  | immune system cells, t                                                                                     | novel regulator of the innate and adaptive immune systems                                               | 37 |
| H2-Aa           | histocompatibility 2, class II antigen A, alpha                              | 2.08 | B-cells                                                                                                    | essential for antigen-specific immune responses                                                         | 38 |
| Cxcl2           | chemokine (C-X-C motif) ligand 2                                             | 2.08 | bone marrow stroma and tissue                                                                              | role during ontogeny of the hematopoietic system                                                        | 39 |
| Tyrobp          | TYRO protein tyrosine kinase binding protein                                 | 2.07 | adult nervous system and nonneural tissues such as kidney, ovary, and testis, and hematopoietic cell lines | anticoagulant actions                                                                                   | 40 |
| H2-Eb1          | histocompatibility 2, class II antigen E beta                                | 2.06 | APC                                                                                                        | immune response                                                                                         | 41 |
| Lilrb4          | leukocyte immunoglobulin-like receptor, subfamily B, member 4                | 2.04 | monocytes, macrophages, dendritic cells, lung, NK cells and B-cells                                        | involved in the down-regulation of the immune response and the development of tolerance                 | 42 |
| C1qc            | complement component 1, q subcomponent, C chain                              | 2.04 | macrophages and dendritic cells                                                                            | clearance of immune complexes and apoptotic cell and modulation of cytokine expression                  | 43 |
| Ddx3y           | DEAD (Asp-Glu-Ala-Asp) box polypeptide 3, Y-linked                           | 2.04 | germ cells                                                                                                 | essential for spermatogenesis                                                                           | 44 |
| Ptpn22          | protein tyrosine phosphatase, non-receptor type 22 (lymphoid)                | 2.03 | lymphoid tissue                                                                                            | immune response                                                                                         | 45 |
| Cd72            | CD72 antigen                                                                 | 2.03 | B-cells and a subset of T-cells                                                                            | plays a role in B-cell proliferation and differentiation                                                | 46 |
| Fn1             | fibronectin 1                                                                | 2.02 | hepatic stellate cells                                                                                     | involved in cell adhesion, cell motility, opsonization, wound healing, and maintenance of cell shape    | 47 |
| IghmAC38.205.12 | Ig mu chain V region AC38 205.12                                             | 2.02 | B lymphocytes                                                                                              | immune development and function                                                                         |    |
| Hmcn1           | hemicentin 1                                                                 | 2.01 | germ cells                                                                                                 | role in cytokinesis                                                                                     | 48 |
| Fcgr2b          | Fc receptor, IgG, low affinity IIb                                           | 2.01 | cells of hematopoietic origin                                                                              | involved in phagocytosis of antigen-antibody complexes and modulation of antibody production by B-cells | 49 |
| H2-Dma          | histocompatibility 2, class II, locus DMA                                    | 2.01 | APCs                                                                                                       | regulates interactions of leukocytes                                                                    | 50 |
| H2-Ab1          | histocompatibility 2, class II antigen A, beta 1                             | 2.01 | APCs                                                                                                       | regulates interactions of leukocytes                                                                    |    |

APC; antigen presenting cells, NK; natural killer, CSF-1; colony-stimulating factor-1

**Supplemental Table 4.** Primers used for recombineering

| Gene                                                        |   | Sequences                                                                                                                                                                                                                                                | Size (bp) |
|-------------------------------------------------------------|---|----------------------------------------------------------------------------------------------------------------------------------------------------------------------------------------------------------------------------------------------------------|-----------|
| GFP                                                         | F | 5'GAAGGAGAGCAAAAGGTAAGAG3'                                                                                                                                                                                                                               | 860       |
|                                                             | R | 5'GCCGATGGGGGTGTTCTG3'                                                                                                                                                                                                                                   |           |
| <i>RpsL<sup>+</sup>-Kana</i> cassette for <i>Renin</i> site | F | 5'GTGATACATGGTGTGTATAAAAGAAGGCTCAGGGGGTCTGGGCTACACAGCTCTTAGAAAGCCTTGGCTGAACCAG <u>C</u> <u>C</u> <u>G</u> <u>G</u> <u>A</u> ATTGCCAGCTGGGG3'(underline is KANA homology)                                                                                 | 1480      |
|                                                             | R | 5'atagacagctgagggcgtagtaagatgccagttcctgtaccctgccacccttctctgcccagttacTCAGAAGAAGCTCGTCAAGAAGGCGATAGAA                                                                                                                                                      |           |
| <i>EGFP</i> for <i>RpsL<sup>+</sup>-Kana</i> cassette       | F | 5'GTGATACATGGTGTGTATAAAAGAAGGCTCAGGGGGTCTGGGCTACACAGCTCTTAGAAAGCCTTGGCTGAACCAGATGGT <u>G</u> <u>A</u> <u>G</u> <u>C</u> <u>A</u> <u>A</u> <u>G</u> <u>G</u> <u>G</u> <u>C</u> <u>G</u> <u>A</u> <u>G</u> <u>G</u> <u>A</u> 3'(underline is GFP homology) | 875       |
|                                                             | R | 5'gatccaacgtatagacagctgagggcgtagtaagatgccagttcctgtaccctgccacccttctctgcccagttacTTACTTGTACAGCTCGTC 3'                                                                                                                                                      |           |
| <b>3' UTR insertion</b>                                     |   |                                                                                                                                                                                                                                                          |           |
| <b>KANA</b>                                                 | F | 5'AGCGGATCCATGGTCCTGCTGGAGTTCGTGACCGCCGC CGGGATCACTCTCGGCATGGACGAGCTGTACAAGTAACCGG AATTGCCAGCTGGGG 3'                                                                                                                                                    | 1481      |
|                                                             | R | 5'atagacagctgagggcgtagtaagatgccagttcctgtaccctgccacccttctctgcccagttacTCAGAAGAAGCTCGTCAAGAAGGCGATAGAA 3'                                                                                                                                                   |           |
| <b>3'UTR</b>                                                | F | 5'AGCGGATCACATGGTCCTGCTGGAGTTCGTGACCGCCG CCGGGATCACTCTCGGCATGGACGAGCTGTACAAGTAAGGC CCTCTGCCACCCAGTAA 3'                                                                                                                                                  | 339       |
|                                                             | R | 5'atccaacgtatagacagctgagggcgtagtaagatgccagttcctgtaccctgccacccttctctgcccagttacGGCTTTAAACATGAAATCTTT 3'                                                                                                                                                    |           |
| <i>RpsL<sup>+</sup>-Kana</i> cassette for <i>RBP-J</i> site | F | 5' TTCCTCATTAGACTCTGTCTAAGCTAGAGGTTGCGGGGCCA GGCCAAACAGGGACTCTAGAGTCATTGGGCTCAGCCACCCC CGGAATTGCCAGCTGGGG 3'                                                                                                                                             | 1494      |
|                                                             | R | 5'GAGACCAAGCTAGGTAGGTATAGGATAAGCAGGACCTGGT CACAGAGCAGAGTGGTGCCAGGCATGGGGGTCAGAAGAAC TCGTCAAGAAGGCGATAGAA 3'                                                                                                                                              |           |
| Mutated <i>RBP-J</i> oligo                                  | F | 5'ATAAGCAGGACCTGGTCACAGAGCAGAGTGGTGGCAGGC ATGGGGG <b><u>CTT</u></b> <b><u>GAA</u></b> AAGGGTGGCTGAGCCCAATGACTCTAGA GTCCCTGTTTGGCCTGGCCC 3'                                                                                                               | 100       |
|                                                             | R | 5'GGGCCAGGCCAAACAGGGACTCTAGAGTCATTGGGCTCA GCCACCCTT <b><u>TTCA</u></b> <b><u>AG</u></b> CCCCCATGCCTGCCACCACTCTGCTC TGTGACCAGGTCCTGCTTAT 3'                                                                                                               |           |
| <i>RBP-J</i>                                                | F | 5'CAGTTCCTCATTAGACTCTG3'                                                                                                                                                                                                                                 | 177       |
|                                                             | R | 5'ATCTTAGCCTGTGAGACC3'                                                                                                                                                                                                                                   |           |

Targeting the RBP-J site. To replace the *RBP-J* site with the *RpsL<sup>+</sup>-Kana* cassette we used the primers labeled as *RpsL<sup>+</sup>-Kana* cassette for the *RBP-J* site. The mutated bases are in bold and underlined in the 'Mutated *RBP-J*' oligonucleotides.



## Supplemental References

### Supplemental Table 3

1. Bothwell AL, Paskind M, Reth M, Imanishi-Kari T, Rajewsky K, Baltimore D: Heavy chain variable region contribution to the NPb family of antibodies: somatic mutation evident in a gamma 2a variable region. *Cell* 24:625-637, 1981
2. Kaplan G, Totsuka A, Thompson P, Akatsuka T, Moritsugu Y, Feinstone SM: Identification of a surface glycoprotein on African green monkey kidney cells as a receptor for hepatitis A virus. *EMBO J* 15:4282-4296, 1996
3. Kjeldsen L, Johnsen AH, Sengelov H, Borregaard N: Isolation and primary structure of NGAL, a novel protein associated with human neutrophil gelatinase. *J Biol Chem* 268:10425-10432, 1993
4. Liu Q, Nilsen-Hamilton M: Identification of a new acute phase protein. *J Biol Chem* 270:22565-22570, 1995
5. Maintz L, Novak N: Histamine and histamine intolerance. *Am J Clin Nutr* 85:1185-1196, 2007
6. Markart P, Faust N, Graf T, Na CL, Weaver TE, Akinbi HT: Comparison of the microbicidal and muramidase activities of mouse lysozyme M and P. *Biochem J* 380:385-392, 2004
7. Knapp MR, Liu CP, Newell N, Ward RB, Tucker PW, Strober S, Blattner F: Simultaneous expression of immunoglobulin mu and delta heavy chains by a cloned B-cell lymphoma: a single copy of the VH gene is shared by two adjacent CH genes. *Proc Natl Acad Sci U S A* 79:2996-3000, 1982
8. Hirano T, Yasukawa K, Harada H, Taga T, Watanabe Y, Matsuda T, Kashiwamura S, Nakajima K, Koyama K, Iwamatsu A, .: Complementary DNA for a novel human interleukin (BSF-2) that induces B lymphocytes to produce immunoglobulin. *Nature* 324:73-76, 1986
9. Zlotnik A, Yoshie O: Chemokines: a new classification system and their role in immunity. *Immunity* 12:121-127, 2000
10. Takai T, Li M, Sylvestre D, Clynes R, Ravetch JV: FcR gamma chain deletion results in pleiotropic effector cell defects. *Cell* 76:519-529, 1994
11. Rennert PD, Ichimura T, Sizing ID, Bailly V, Li Z, Rennard R, McCoon P, Pablo L, Miklasz S, Tarilonte L, Bonventre JV: T cell, Ig domain, mucin domain-2 gene-deficient mice reveal a novel mechanism for the regulation of Th2 immune responses and airway inflammation. *J Immunol* 177:4311-4321, 2006
12. Aoki-Ota M, Torkamani A, Ota T, Schork N, Nemazee D: Skewed primary Iggkappa repertoire and V-J joining in C57BL/6 mice: implications for recombination accessibility and receptor editing. *J Immunol* 188:2305-2315, 2012

13. Harada N, Negishi M: Substrate specificities of cytochrome P-450, C-P-450(16)alpha and P-450(15)alpha, and contribution to steroid hydroxylase activities in mouse liver microsomes. *Biochem Pharmacol* 37:4778-4780, 1988
14. Zhang J, Lu Y, Pienta KJ: Multiple roles of chemokine (C-C motif) ligand 2 in promoting prostate cancer growth. *J Natl Cancer Inst* 102:522-528, 2010
15. Nakayama K, Nakayama K, Negishi I, Kuida K, Shinkai Y, Louie MC, Fields LE, Lucas PJ, Stewart V, Alt FW, .: Disappearance of the lymphoid system in Bcl-2 homozygous mutant chimeric mice. *Science* 261:1584-1588, 1993
16. Weaver D, Reis MH, Albanese C, Costantini F, Baltimore D, Imanishi-Kari T: Altered repertoire of endogenous immunoglobulin gene expression in transgenic mice containing a rearranged mu heavy chain gene. *Cell* 45:247-259, 1986
17. Ajuebor MN, Swain MG: Role of chemokines and chemokine receptors in the gastrointestinal tract. *Immunology* 105:137-143, 2002
18. Ishibashi K, Suzuki M, Sasaki S, Imai M: Identification of a new multigene four-transmembrane family (MS4A) related to CD20, HTm4 and beta subunit of the high-affinity IgE receptor. *Gene* 264:87-93, 2001
19. Tatsumi K, Higuchi T, Fujiwara H, Nakayama T, Itoh K, Mori T, Fujii S, Fujita J: Expression of calcium binding protein D-9k messenger RNA in the mouse uterine endometrium during implantation. *Mol Hum Reprod* 5:153-161, 1999
20. Geijtenbeek TB, Torensma R, van Vliet SJ, van Duijnhoven GC, Adema GJ, van KY, Figdor CG: Identification of DC-SIGN, a novel dendritic cell-specific ICAM-3 receptor that supports primary immune responses. *Cell* 100:575-585, 2000
21. Baud V, Chisoe SL, Viegas-Pequignot E, Diriong S, N'Guyen VC, Roe BA, Lipinski M: EMR1, an unusual member in the family of hormone receptors with seven transmembrane segments. *Genomics* 26:334-344, 1995
22. Kofler R, Strohal R, Balderas RS, Johnson ME, Noonan DJ, Duchosal MA, Dixon FJ, Theofilopoulos AN: Immunoglobulin kappa light chain variable region gene complex organization and immunoglobulin genes encoding anti-DNA autoantibodies in lupus mice. *J Clin Invest* 82:852-860, 1988
23. Spilsbury K, O'Mara MA, Wu WM, Rowe PB, Symonds G, Takayama Y: Isolation of a novel macrophage-specific gene by differential cDNA analysis. *Blood* 85:1620-1629, 1995
24. Reif K, Cyster JG: RGS molecule expression in murine B lymphocytes and ability to down-regulate chemotaxis to lymphoid chemokines. *J Immunol* 164:4720-4729, 2000
25. Bouchon A, Cella M, Grierson HL, Cohen JL, Colonna M: Activation of NK cell-mediated cytotoxicity by a SAP-independent receptor of the CD2 family. *J Immunol* 167:5517-5521, 2001
26. Robinson MJ, Sancho D, Slack EC, LeibundGut-Landmann S, Reis e Sousa: Myeloid C-type lectins in innate immunity. *Nat Immunol* 7:1258-1265, 2006

27. Crass T, Raffetseder U, Martin U, Grove M, Klos A, Kohl J, Bautsch W: Expression cloning of the human C3a anaphylatoxin receptor (C3aR) from differentiated U-937 cells. *Eur J Immunol* 26:1944-1950, 1996
28. Gerard C, Rollins BJ: Chemokines and disease. *Nat Immunol* 2:108-115, 2001
29. Cao W, Bobryshev YV, Lord RS, Oakley RE, Lee SH, Lu J: Dendritic cells in the arterial wall express C1q: potential significance in atherogenesis. *Cardiovasc Res* 60:175-186, 2003
30. Kumamoto Y, da-Nagai K, Aida S, Higashi N, Irimura T: MGL2 Dermal dendritic cells are sufficient to initiate contact hypersensitivity in vivo. *PLoS One* 4:e5619, 2009
31. Janeway CA, Jr., Medzhitov R: Innate immune recognition. *Annu Rev Immunol* 20:197-216, 2002
32. Katz HR, Austen KF: A newly recognized pathway for the negative regulation of mast cell-dependent hypersensitivity and inflammation mediated by an endogenous cell surface receptor of the gp49 family. *J Immunol* 158:5065-5070, 1997
33. Kim T, Ha H, Kim N, Park ES, Rho J, Kim EC, Lorenzo J, Choi Y, Lee SH: ATP6v0d2 deficiency increases bone mass, but does not influence ovariectomy-induced bone loss. *Biochem Biophys Res Commun* 403:73-78, 2010
34. Rabs U, Martin H, Hitschold T, Golan MD, Heinz HP, Loos M: Isolation and characterization of macrophage-derived C1q and its similarities to serum C1q. *Eur J Immunol* 16:1183-1186, 1986
35. van BN, Chambost H, Ferrant A, Michaux L, Ikeda H, Millard I, Olive D, Boon T, Coulie PG: PRAME, a gene encoding an antigen recognized on a human melanoma by cytolytic T cells, is expressed in acute leukaemia cells. *Br J Haematol* 102:1376-1379, 1998
36. Fairman WA, Vandenberg RJ, Arriza JL, Kavanaugh MP, Amara SG: An excitatory amino acid transporter with properties of a ligand-gated chloride channel. *Nature* 375:599-603, 1995
37. Fournier N, Chalus L, Durand I, Garcia E, Pin JJ, Churakova T, Patel S, Zlot C, Gorman D, Zurawski S, Abrams J, Bates EE, Garrone P: FDF03, a novel inhibitory receptor of the immunoglobulin superfamily, is expressed by human dendritic and myeloid cells. *J Immunol* 165:1197-1209, 2000
38. Janitz M, Reiners-Schramm L, Lauster R: Expression of the H2-Ea gene is modulated by a polymorphic transcriptional enhancer. *Immunogenetics* 48:266-272, 1998
39. Levesque JP, Hendy J, Takamatsu Y, Simmons PJ, Bendall LJ: Disruption of the CXCR4/CXCL12 chemotactic interaction during hematopoietic stem cell mobilization induced by G-CSF or cyclophosphamide. *J Clin Invest* 111:187-196, 2003
40. Stitt TN, Conn G, Gore M, Lai C, Bruno J, Radziejewski C, Mattsson K, Fisher J, Gies DR, Jones PF, .: The anticoagulation factor protein S and its relative, Gas6, are ligands for the Tyro 3/Axl family of receptor tyrosine kinases. *Cell* 80:661-670, 1995

41. Saha BK: Typing of murine major histocompatibility complex with a microsatellite in the class II Eb gene. *J Immunol Methods* 194:77-83, 1996
42. Chang CC, Ciubotariu R, Manavalan JS, Yuan J, Colovai AI, Piazza F, Lederman S, Colonna M, Cortesini R, la-Favera R, Suciuc-Foca N: Tolerization of dendritic cells by T(S) cells: the crucial role of inhibitory receptors ILT3 and ILT4. *Nat Immunol* 3:237-243, 2002
43. Lu JH, Teh BK, Wang L, Wang YN, Tan YS, Lai MC, Reid KB: The classical and regulatory functions of C1q in immunity and autoimmunity. *Cell Mol Immunol* 5:9-21, 2008
44. Abdelhaleem M, Sun TH, Ho M: DHX32 expression suggests a role in lymphocyte differentiation. *Anticancer Res* 25:2645-2648, 2005
45. Arechiga AF, Habib T, He Y, Zhang X, Zhang ZY, Funk A, Buckner JH: Cutting edge: the PTPN22 allelic variant associated with autoimmunity impairs B cell signaling. *J Immunol* 182:3343-3347, 2009
46. Wu HJ, Bondada S: Positive and negative roles of CD72 in B cell function. *Immunol Res* 25:155-166, 2002
47. Xu G, Niki T, Virtanen I, Rogiers V, De BP, Geerts A: Gene expression and synthesis of fibronectin isoforms in rat hepatic stellate cells. Comparison with liver parenchymal cells and skin fibroblasts. *J Pathol* 183:90-98, 1997
48. Jordan SN, Olson S, Canman JC: Cytokinesis: thinking outside the cell. *Curr Biol* 21:R119-R121, 2011
49. Nimmerjahn F, Ravetch JV: Analyzing antibody-Fc-receptor interactions. *Methods Mol Biol* 415:151-162, 2008
50. Mach B, Steimle V, Martinez-Soria E, Reith W: Regulation of MHC class II genes: lessons from a disease. *Annu Rev Immunol* 14:301-331, 1996

## Supplemental Figure 1

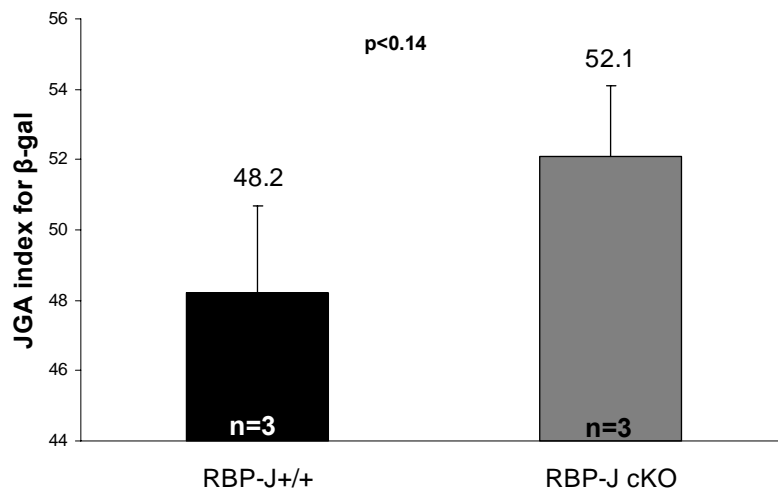

**Supplemental Figure 1.** Deletion of *RBP-J* does not affect the number of LacZ-positive JGAs. Kidneys from *RBP-J*<sup>+/+</sup>; *Ren1*<sup>dcre/+</sup>; *R26R*<sup>+/+</sup> (RBP-J +/+) control and *RBP-J*<sup>fl/fl</sup>; *Ren1*<sup>dcre/+</sup>; *R26R*<sup>+/+</sup> (RBP-J cKO) mice were subjected to the X-gal reaction to label the LacZ positive cells. In 2 month old mice the percentage of JGAs containing LacZ-positive cells was not significantly different between control (n=3) and mutant mice (n=3). Values are means  $\pm$  SEM.

## Supplemental Figure 2

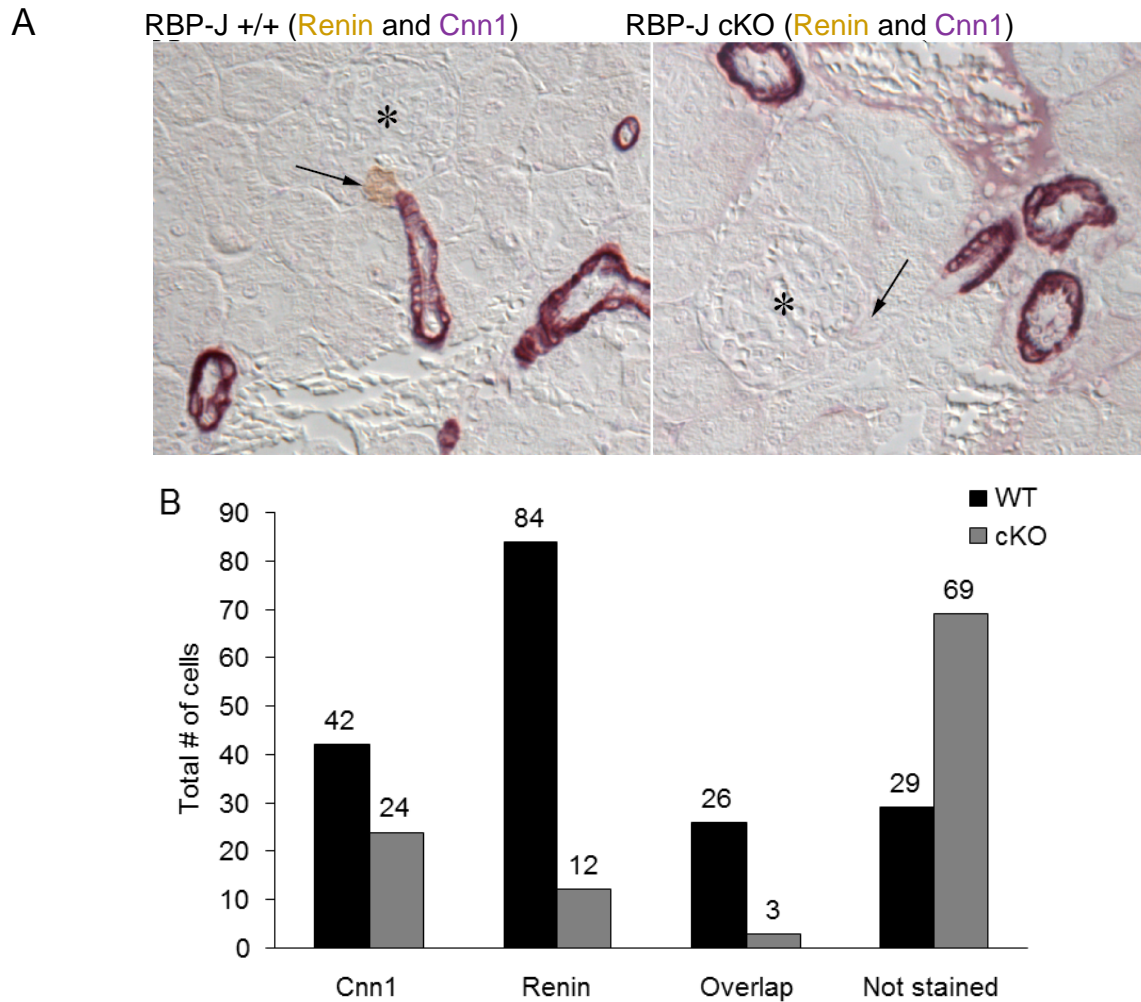

**Supplemental Figure 2.** Expression of renin and Cnn 1 in *RBP-J cKO* mice. Double staining for renin and Cnn1 in *RBP-J cKO* mice at 2 months of age. (A) *RBP-J cKO* mice have few or no renin positive (brown) cells in the JGAs and less Cnn1 (purple) expression. (B) Quantification of double staining for renin and Cnn1 using the categories described for Figure 3. *RBP-J cKO* mice had a significant increase in the number of unstained cells and a decrease in the number of Cnn1 only, renin only and overlap cells. A total of 110 JGAs were counted in the controls ( $n=2$ ) and 76 JGAs in the *RBP-J cKO* ( $n=2$ ). Asterisks mark glomeruli.

### Supplemental Figure 3

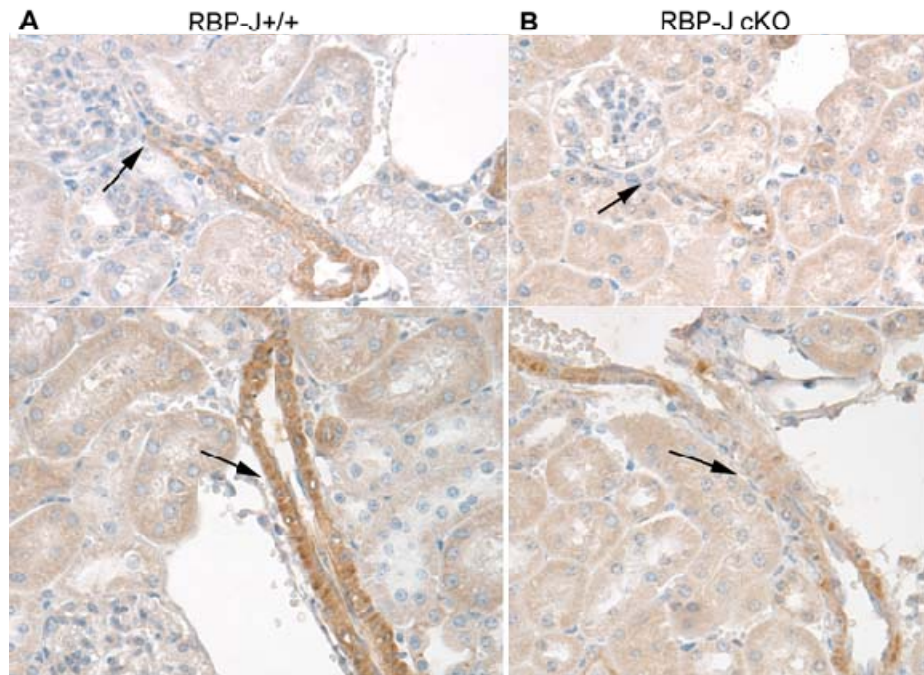

**Supplemental Figure 3.** Deletion of *RBP-J* affects *Crip1* expression. Immunostaining for Crip1 in *RBP-J*  $+/+$  and *RBP-J* *cKO* mice at 2 months of age shows that: (A) Crip1 is expressed in the JGA and afferent arterioles (upper) and in interlobular arteries (lower) in *RBP-J*  $+/+$  kidney. (B) In the *RBP-J* *cKO* mice there is an overall decrease in Crip1 expression in the JGA, in afferent arterioles and in interlobular arteries. Arrows in upper panels, JGA; in lower panels, interlobular artery

## Supplemental Figure 4

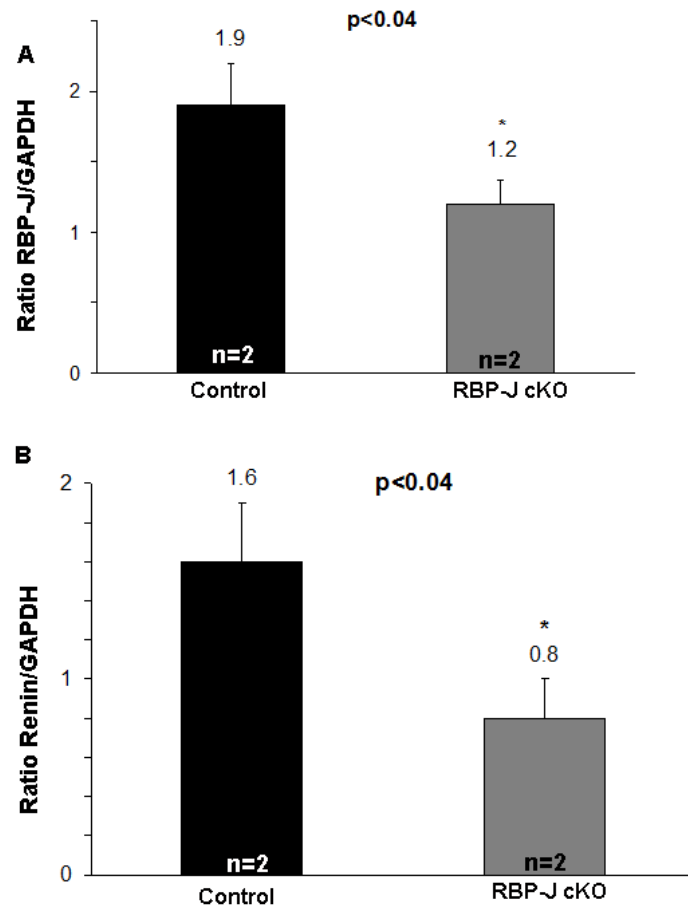

**Supplemental Figure 4.** Semiquantitative PCR for *RBP-J* and renin in isolated arterioles. (A) In the *RBP-J cKO* there is 1.5-fold decrease in *RBP-J* mRNA and (B) a 2-fold decrease in renin mRNA when compared to controls. Values are means ± SEM \*, p < 0.05



**Supplemental Figure 5.** Sequence of the renin promoter surrounding the mutated RBP-J binding site in Mut-BAC mice. To ensure that only intended recombination occurred at the RBP-J binding site after generation of the transgenic mice, we extracted DNA from tails of transgenic WT-BAC and Mut-BAC mice and sequenced the region upstream of the RBP-J site to the GFP insertion. The diagram shows a textual representation of the pairwise alignment of the region flanking the RBP-J DNA binding site from the Mut-BAC mice and the endogenous renin gene. In the endogenous renin gene (query), the RBP-J consensus sequence is 5'-TGTGGGAA-3' marked in yellow while in the Mut-BAC it is in purple (Sbjct). Results shows that Mut-BAC mice had the intended four nucleotides mutated and that the flanking region of the RBP-J binding site of the Mut-BAC matches perfectly with the endogenous renin gene.

**Blast WT versus Mut BAC**

Score = 1411 bits (764), Expect = 0.0

Identities = 780/787 (99%), Gaps = 3/787 (0%)

Strand=Plus/Plus

```

Query 9      TTATCTAATCTCCCCAG-AGGCCTCCAGCATTTCAGCTGCCAGACCACCCAGTGCCT 67
          |||
Sbjct 10     TTATCT-ATCTCCCCAGAAGGCCTCCAGCATTTCAGCTGCCAGACCACCCAGTGCCT 68

Query 68     TCCCCTGCTGTCTGCCCGCCAGTCTCTCTGAGCTCTGGTGAGTCTCGCCACCTCCTTT 127
          |||
Sbjct 69     TCCCCTGCTGTCTGCCCGCCAGTCTCTCTGAGCTCTGGTGAGTCTCGCCACCTCCTTT 128

Query 128    ATTTCCCCACGCCAGGTGCCCAACAAGGCCCATGGCAGGGCAGCTCTGATAAATCTTAGC 187
          |||
Sbjct 129    ATTTCCCCACGCCAGGTGCCCAACAAGGCCCATGGCAGGGCAGCTCTGATAAATCTTAGC 188

Query 188    CTGTGAGACCAAGCTAGGTAGGTATAGGATAAGCAGGACCTGGTCACAGAGCAGAGTGGT 247
          |||
Sbjct 189    CTGTGAGACCAAGCTAGGTAGGTATAGGATAAGCAGGACCTGGTCACAGAGCAGAGTGGT 248

Query 248    GGCAGGCATGGGGGTGTGGGAA GGGTGGCTGAGCCAATGACTCTAGAGTCCCTGTTTGG 307
          |||
Sbjct 249    GGCAGGCATGGGGCTTGAAAA GGGTGGCTGAGCCAATGACTCTAGAGTCCCTGTTTGG 308

Query 308    CCTGGCCCCGCAACCTCTAGCTTAGACAGAGTCTAATGAGGAACTGTGCTGTTCAAGCAT 367
          |||
Sbjct 309    CCTGGCCCCGCAACCTCTAGCTTAGACAGAGTCTAATGAGGAACTGTGCTGTTCAAGCAT 368

Query 368    GAGGTCAGGGTACAGACAGCATAGACCCTGGCTTCAAACCTCTAACTCAGACCCTACCAC 427
          |||
Sbjct 369    GAGGTCAGGGTACAGACAGCATAGACCCTGGCTTCAAACCTCTAACTCAGACCCTACCAC 428

Query 428    TCATGCCCCTGAGCCTGCATCTTCTATATTAACCTTCAAATCACCCCTGGCTGGCTCCTC 487
          |||
Sbjct 429    TCATGCCCCTGAGCCTGCATCTTCTATATTAACCTTCAAATCACCCCTGGCTGGCTCCTC 488

Query 488    CTAGGCTCTGCCCTAGTCTTCCATCTTGATCATGGGTGATTCCTTTTGGCTGCTGCCTAG 547
          |||

```

```

Sbjct  489  CTAGGCTCTGCCCTAGTCTTCCATCTTGATCATGGGTGATTCCTTTTGGCTGCTGCCTAG  548
Query  548  TTGGAAAAGTAACCTGTCATCTAACCTCTGGCATCAGGGAGAGGGGTGGGGTGTCCCCTC  607
      |||
Sbjct  549  TTGGAAAAGTAACCTGTCATCTAACCTCTGGCATCAGGGAGAGGGGTGGGGTGTCCCCTC  608
Query  608  CTGGGGTTAGTGATAGTGGACAGAAGGGTAGCTCTAAAAGAAAGGAGGTCTCAAGCGCAG  667
      |||
Sbjct  609  CTGGGGTTAGTGATAGTGGACAGAAGGGTAGCTCTAAAAGAAAGGAGGTCTCAAGCGCAG  668
Query  668  CTGGCTTCCAGCTGACCCCTCCTACTGGCCCTTCACTCCCTTAGACCTATCCTTTTGCC  727
      |||
Sbjct  669  CTGGCTTCCAGCTGACCCCTCCTACTGGCCCTTCACTCCCTTAGACCTATCCTTTTGCC  728
Query  728  CCCTTCCTTCTTCCTGTACCCTCTCAGAAGCCTGGCAGAGCTGTCGAAGTGACCTGAAC  787
      |||
Sbjct  729  CCCTTCCTTCTTCCTGTACCCTCTCAGAAGCCTGGCAGAGCTGTCGAAGTGACCTGAAC  788
Query  788  CC-TGGC   793
      || |||
Sbjct  789  CCCTGGC   795

```
